# Supplementary material
Source: PubMed Central journal article supplement (PMC4784823)
Supplement: andk025407.ww1_default.pdf [file andk025407.ww1_default.pdf]

## **Web appendix 1** - Complete list of ICD-diagnoses used in the study

### **Arrhythmias - Primary Outcome**

All ICD- codes mentioned in secondary outcomes, plus ICD 10 - I47.9 /ICD 9 - 427.A / ICD-8 427.98

### **Arrhythmias - Secondary Outcomes**

#### **Atrial fibrillation/flutter**

##### **ICD-10**

**I48.9** Atrial fibrillation and flutter

##### **ICD-9**

**427D** Atrial fibrillation and flutter

##### **ICD-8**

**427.92** Atrial fibrillation

#### **Bradycardias**

##### **ICD -10**

**I44.1** Atrioventricular block, second degree

**I44.2** Atrioventricular block, complete

**I45.2** Bifascicular block

**I45.3** Trifascicular block

**I45.9** Conduction disorder, unspecified

**I49.5** Sick sinus syndrome

##### **ICD-9**

**426A** Atrioventricular block, third degree

**426B** Atrioventricular block, second degree

**426G** Sinoatrial heart block

**426X** Conduction disorder, unspecified

##### **ICD-8**

**427.20** Syndroma Adams-Stokes

**427.28** Dissociatio cordis alia

#### **Other supraventricular arrhythmias**

##### **ICD-10**

**I45.6** Pre-excitation syndrome

**I47.1** Supraventricular tachycardia

##### **ICD-9**

**426H** Atrioventricular excitation, anomalous

**427A** Tachycardia, paroxysmal supraventricular

##### **ICD-8**

**427.90** Tachycardia, paroxysmal supraventricular

#### **Cardiac arrest and ventricular arrhythmias**

##### **ICD-10**

**I46.0** Cardiac arrest with successful resuscitation

I46.1 Sudden cardiac death, so described Excludes: sudden death:

I46.9 Cardiac arrest, unspecified

I47.0 Re-entry ventricular arrhythmia

I47.2 Ventricular tachycardia

I49.0 Ventricular fibrillation and flutter

R96.0 Instantaneous death

#### **ICD-9**

427B Paroxysmal ventricular tachycardia

427E Ventricular fibrillation and flutter

427F Cardiac arrest

798B Sudden death, cause unknown

#### **ICD-8**

427.91 Paroxysmal ventricular tachycardia

795,99 Sudden death, cause unknown

### **Vascular disease – primary outcome**

All ICD- codes mentioned in secondary outcomes

### **Vascular disease – secondary outcomes**

#### **Ischemic heart disease**

##### **ICD-10**

**I20-I25** Ischemic heart diseases

##### **ICD-9**

**410-414** Ischemic heart diseases

##### **ICD-8**

**410-414** Ischemic heart diseases

#### **Heart Failure**

##### **ICD-10**

**I11.0** Hypertensive heart disease with (congestive) heart failure

**I50.0-9** Heart failure

##### **ICD-9**

**428A** Chronic heart failure

**428B** Left heart failure

**428X** Heart failure, unspecified

##### **ICD-8**

**427,00** Uncompensated heart failure

**427,10** Pulmonary edema

## **Stroke**

### **ICD-10**

**I60.0-9** Subarachnoid haemorrhage

**I61.0-9** Intracerebral haemorrhage

**I63.0-9** Cerebral infarction

**I64.0-9** Stroke, not specified as haemorrhage or infarction

### **ICD-9**

**430-438** Cerebrovascular disease

### **ICD-8**

**430-438** Cerebrovascular disease

## **Cardiovascular death**

### **ICD-10**

I.00-99 Diseases of the circulatory system

### **ICD-9**

390-459 Diseases of the circulatory system

### **ICD-8**

390-458 Diseases of the circulatory system
