# Supplementary material
Source: PubMed Central journal article supplement (PMC4784823)
Supplement: andk025407.ww3_default.pdf [file andk025407.ww3_default.pdf]

**Web appendix 3: Web tables**

**Web table 1** Cox proportional hazard ratios (95% CI) for vascular disease and arrhythmias comparing fifths of exercise capacity and muscle strength.

|                                     | Vascular disease |                  | Arrhythmia       |                  |
|-------------------------------------|------------------|------------------|------------------|------------------|
| <b>Exercise capacity (in fifth)</b> | <b>Model A*</b>  | <b>Model B**</b> | <b>Model A*</b>  | <b>Model B**</b> |
| <b>1st</b>                          | 1.00 (ref)       | 1.00 (ref)       | 1.00 (ref)       | 1.00 (ref)       |
| <b>2nd</b>                          | 0.92 (0.89-0.95) | 0.85 (0.82-0.88) | 0.93 (0.90-0.99) | 0.91 (0.87-0.96) |
| <b>3rd</b>                          | 0.90 (0.87-0.93) | 0.79 (0.76-0.82) | 0.97 (0.93-1.02) | 0.91 (0.87-0.96) |
| <b>4th</b>                          | 0.81 (0.78-0.84) | 0.70 (0.67-0.73) | 0.97 (0.92-1.02) | 0.91 (0.86-0.96) |
| <b>5th</b>                          | 0.77 (0.73-0.80) | 0.64 (0.61-0.67) | 1.07 (1.01-1.13) | 0.99 (0.94-1.04) |
| <b>Per category</b>                 | 0.94 (0.93-0.95) | 0.90 (0.89-0.90) | 1.02 (1.00-1.03) | 1.00 (0.98-1.01) |
| <b>Muscle Strength (in fifth)</b>   | <b>Model A*</b>  | <b>Model B**</b> | <b>Model A*</b>  | <b>Model B**</b> |
| <b>1st</b>                          | 1.00 (ref)       | 1.00 (ref)       | 1.00 (ref)       | 1.00 (ref)       |
| <b>2nd</b>                          | 0.96 (0.93-1.00) | 0.92 (0.89-0.95) | 0.92 (0.87-0.96) | 0.89 (0.85-0.93) |
| <b>3rd</b>                          | 0.94 (0.90-0.98) | 0.86 (0.82-0.90) | 0.95 (0.90-1.00) | 0.90 (0.86-0.95) |
| <b>4th</b>                          | 0.95 (0.91-0.99) | 0.83 (0.80-0.87) | 0.95 (0.90-0.99) | 0.87 (0.83-0.92) |
| <b>5th</b>                          | 0.99 (0.95-1.03) | 0.79 (0.76-0.83) | 0.99 (0.94-1.04) | 0.87 (0.83-0.91) |
| <b>Per category</b>                 | 1.00 (0.99-1.01) | 0.95 (0.94-0.95) | 1.00 (0.99-1.02) | 0.97 (0.96-0.98) |

\*Adjusted for age, conscription date, region, education level, height and muscle strength/exercise capacity (muscle strength adjusted for exercise capacity, and vice versa).

\*\*Additionally adjusted systolic and diastolic blood pressure, weight and ischemic heart disease (for arrhythmia outcomes only).

**Web table 2** Cox proportional hazard ratios (95% CI) for subgroups of vascular disease comparing fifths of exercise capacity and muscle strength.

|                                      | Ischemic heart disease |                  | Heart Failure    |                  | Stroke           |                  | Cardiovascular death |                  |
|--------------------------------------|------------------------|------------------|------------------|------------------|------------------|------------------|----------------------|------------------|
| <b>Exercise capacity (in fifths)</b> | <b>Model A*</b>        | <b>Model B**</b> | <b>Model A*</b>  | <b>Model B**</b> | <b>Model A*</b>  | <b>Model B**</b> | <b>Model A*</b>      | <b>Model B**</b> |
| <b>1st</b>                           | 1.00 (ref)             | 1.00 (ref)       | 1.00 (ref)       | 1.00 (ref)       | 1.00 (ref)       | 1.00 (ref)       | 1.00 (ref)           | 1.00 (ref)       |
| <b>2nd</b>                           | 0.93 (0.89-0.98)       | 0.86 (0.82-0.91) | 0.91 (0.83-0.99) | 0.82 (0.76-0.90) | 0.91 (0.85-0.97) | 0.87 (0.81-0.93) | 0.89 (0.83-0.96)     | 0.82 (0.77-0.88) |
| <b>3rd</b>                           | 0.95 (0.91-1.01)       | 0.83 (0.79-0.88) | 0.88 (0.80-0.96) | 0.74 (0.67-0.81) | 0.84 (0.78-0.90) | 0.77 (0.72-0.83) | 0.83 (0.77-0.89)     | 0.72 (0.66-0.77) |
| <b>4th</b>                           | 0.86 (0.81-0.91)       | 0.73 (0.68-0.77) | 0.81 (0.73-0.89) | 0.66 (0.60-0.74) | 0.78 (0.72-0.84) | 0.71 (0.66-0.77) | 0.73 (0.67-0.79)     | 0.62 (0.56-0.67) |
| <b>5th</b>                           | 0.78 (0.73-0.83)       | 0.64 (0.60-0.68) | 0.75 (0.66-0.84) | 0.60 (0.53-0.67) | 0.74 (0.68-0.80) | 0.66 (0.61-0.72) | 0.70 (0.64-0.77)     | 0.58 (0.53-0.64) |
| <b>Per category</b>                  | 0.95 (0.93-0.96)       | 0.90 (0.89-0.91) | 0.93 (0.91-0.96) | 0.88 (0.86-0.90) | 0.92 (0.91-0.94) | 0.90 (0.88-0.92) | 0.91 (0.89-0.93)     | 0.87 (0.85-0.88) |
| <b>Muscle Strength (in fifths)</b>   | <b>Model A*</b>        | <b>Model B**</b> | <b>Model A*</b>  | <b>Model B**</b> | <b>Model A*</b>  | <b>Model B**</b> | <b>Model A*</b>      | <b>Model B**</b> |
| <b>1st</b>                           | 1.00 (ref)             | 1.00 (ref)       | 1.00 (ref)       | 1.00 (ref)       | 1.00 (ref)       | 1.00 (ref)       | 1.00 (ref)           | 1.00 (ref)       |
| <b>2nd</b>                           | 1.02 (0.97-1.08)       | 0.97 (0.92-1.03) | 0.83 (0.76-0.91) | 0.78 (0.71-0.85) | 1.02 (0.96-1.10) | 0.99 (0.93-1.07) | 0.82 (0.76-0.89)     | 0.78 (0.72-0.84) |
| <b>3rd</b>                           | 1.01 (0.96-1.08)       | 0.92 (0.87-0.98) | 0.78 (0.71-0.87) | 0.70 (0.63-0.77) | 0.96 (0.88-1.03) | 0.91 (0.84-0.98) | 0.84 (0.77-0.91)     | 0.76 (0.70-0.82) |
| <b>4th</b>                           | 1.02 (0.96-1.08)       | 0.88 (0.83-0.94) | 0.75 (0.68-0.83) | 0.63 (0.57-0.70) | 1.00 (0.93-1.08) | 0.92 (0.86-1.00) | 0.82 (0.75-0.89)     | 0.70 (0.64-0.76) |
| <b>5th</b>                           | 1.10 (1.04-1.17)       | 0.87 (0.82-0.93) | 0.79 (0.71-0.88) | 0.58 (0.52-0.64) | 1.01 (0.94-1.10) | 0.89 (0.82-0.96) | 0.86 (0.79-0.94)     | 0.67 (0.62-0.73) |
| <b>Per category</b>                  | 1.02 (1.01-1.03)       | 0.96 (0.95-0.98) | 0.94 (0.92-0.97) | 0.88 (0.86-0.90) | 1.00 (0.98-1.02) | 0.97 (0.95-0.99) | 0.97 (0.95-0.99)     | 0.91 (0.90-0.93) |

\*Adjusted for age, conscription date, region, education level, height and muscle strength/exercise capacity (muscle strength adjusted for exercise capacity, and vice versa).

\*\*Additionally adjusted systolic and diastolic blood pressure and weight.

**Web table 3** Cox proportional hazard ratios (95% CI) for subgroups of arrhythmias, comparing fifths of exercise capacity and muscle strength.

|                              | Atrial fibrillation/flutter |                  | Bradyarrhythmias |                  | Supraventricular tachycardias |                  | Ventricular arrhythmias/ Sudden cardiac death |                  |
|------------------------------|-----------------------------|------------------|------------------|------------------|-------------------------------|------------------|-----------------------------------------------|------------------|
| Exercise capacity (in fifth) | Model A*                    | Model B**        | Model A*         | Model B**        | Model A*                      | Model B**        | Model A*                                      | Model B**        |
| 1st                          | 1.00 (ref)                  | 1.00 (ref)       | 1.00 (ref)       | 1.00 (ref)       | 1.00 (ref)                    | 1.00 (ref)       | 1.00 (ref)                                    | 1.00 (ref)       |
| 2nd                          | 0.99 (0.93-1.06)            | 0.95 (0.89-1.02) | 0.89 (0.76-1.05) | 0.88 (0.75-1.04) | 0.94 (0.84-1.04)              | 0.93 (0.83-1.04) | 0.95 (0.82-1.10)                              | 0.97 (0.84-1.12) |
| 3rd                          | 1.07 (1.00-1.14)            | 0.99 (0.93-1.06) | 0.88 (0.74-1.04) | 0.86 (0.72-1.01) | 0.94 (0.84-1.05)              | 0.94 (0.83-1.05) | 0.95 (0.81-1.11)                              | 0.96 (0.81-1.12) |
| 4th                          | 1.11 (1.04-1.19)            | 1.02 (0.95-1.09) | 0.95 (0.80-1.13) | 0.93 (0.78-1.11) | 0.90 (0.80-1.01)              | 0.90 (0.80-1.01) | 0.87 (0.74-1.03)                              | 0.90 (0.77-1.06) |
| 5th                          | 1.31 (1.23-1.40)            | 1.17 (1.09-1.25) | 1.03 (0.86-1.23) | 1.01 (0.84-1.21) | 0.88 (0.79-0.99)              | 0.89 (0.79-1.00) | 1.04 (0.88-1.23)                              | 1.09 (0.92-1.29) |
| Per category                 | 1.07 (1.05-1.09)            | 1.04 (1.03-1.06) | 1.01 (0.97-1.05) | 1.01 (0.96-1.05) | 0.97 (0.95-1.00)              | 0.97 (0.95-1.00) | 1.00 (0.96-1.04)                              | 1.01 (0.97-1.05) |
| Muscle Strength (in fifth)   | Model A*                    | Model B**        | Model A*         | Model B**        | Model A*                      | Model B**        | Model A*                                      | Model B**        |
| 1st                          | 1.00 (ref)                  | 1.00 (ref)       | 1.00 (ref)       | 1.00 (ref)       | 1.00 (ref)                    | 1.00 (ref)       | 1.00 (ref)                                    | 1.00 (ref)       |
| 2nd                          | 0.95 (0.89-1.02)            | 0.92 (0.86-0.99) | 0.95 (0.80-1.11) | 0.93 (0.79-1.10) | 0.94 (0.84-1.04)              | 0.93 (0.83-1.04) | 0.87 (0.75-1.01)                              | 0.86 (0.75-1.00) |
| 3rd                          | 0.98 (0.92-1.05)            | 0.93 (0.87-1.00) | 0.95 (0.80-1.13) | 0.92 (0.77-1.10) | 1.00 (0.89-1.12)              | 1.00 (0.89-1.12) | 0.96 (0.82-1.13)                              | 0.95 (0.81-1.12) |
| 4th                          | 0.99 (0.93-1.06)            | 0.91 (0.85-0.98) | 0.91 (0.77-1.09) | 0.87 (0.74-1.04) | 1.03 (0.92-1.15)              | 1.03 (0.92-1.16) | 0.74 (0.63-0.87)                              | 0.72 (0.61-0.85) |
| 5th                          | 1.05 (0.98-1.12)            | 0.91 (0.85-0.98) | 0.85 (0.71-1.02) | 0.79 (0.65-0.95) | 1.09 (0.97-1.22)              | 1.09 (0.96-1.22) | 0.79 (0.67-0.93)                              | 0.74 (0.63-0.88) |
| Per category                 | 1.02 (1.00-1.03)            | 0.98 (0.97-1.00) | 0.96 (0.93-1.00) | 0.95 (0.91-0.99) | 1.03 (1.00-1.06)              | 1.03 (1.00-1.06) | 0.94 (0.90-0.97)                              | 0.93 (0.89-0.96) |

\*Adjusted for age, conscription date, region, education level, height and muscle strength/exercise capacity (muscle strength adjusted for exercise capacity, and vice versa).

\*\*Additionally adjusted systolic and diastolic blood pressure, weight and ischemic heart disease.
